# Supplementary material
Source: PubMed Central journal article supplement (PMC2040413)

# ANTERIOR SEGMENT - axial

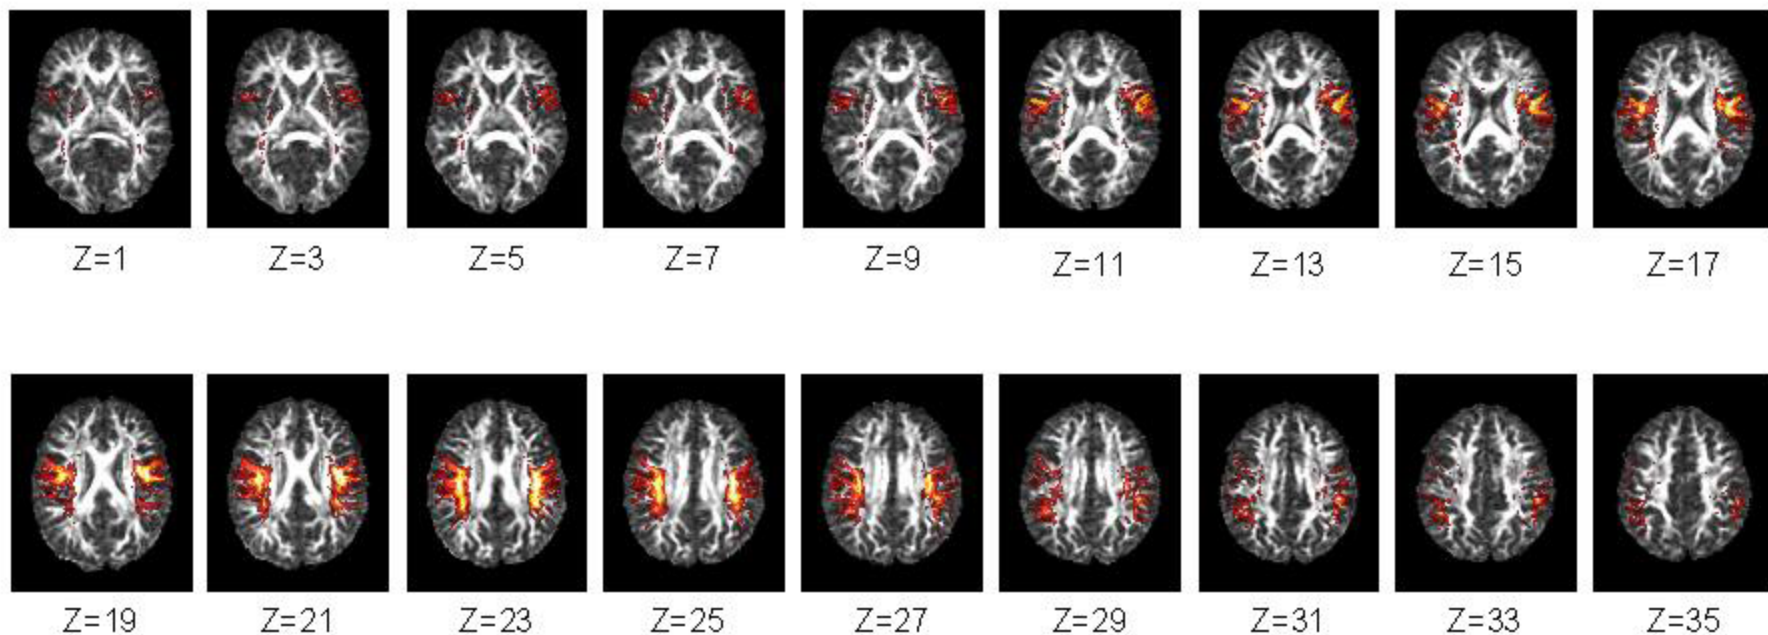

# ANTERIOR SEGMENT-sagittal

Right

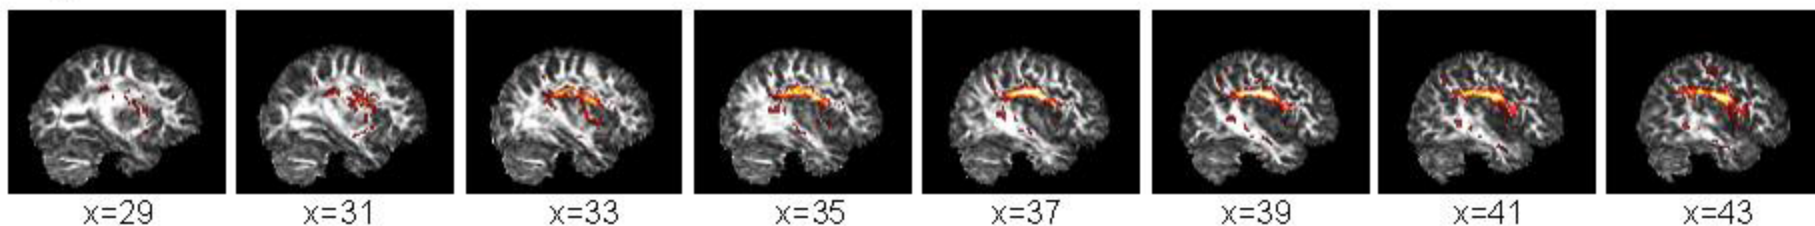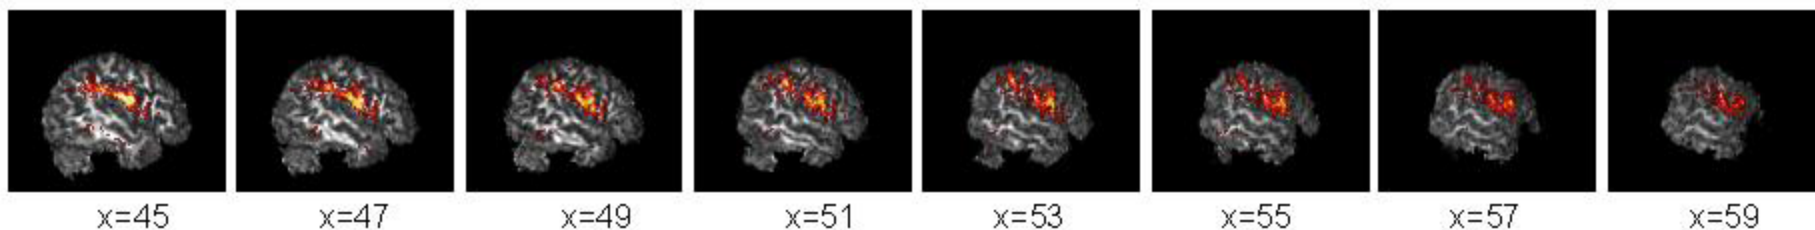

Left

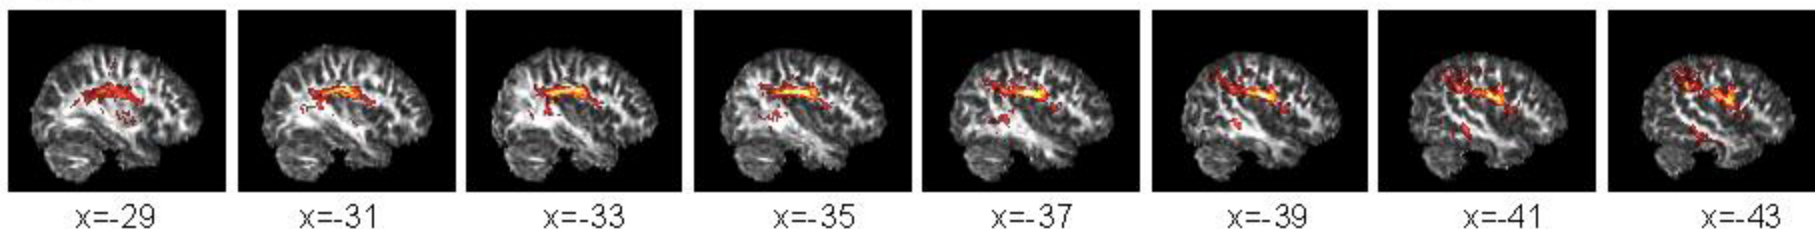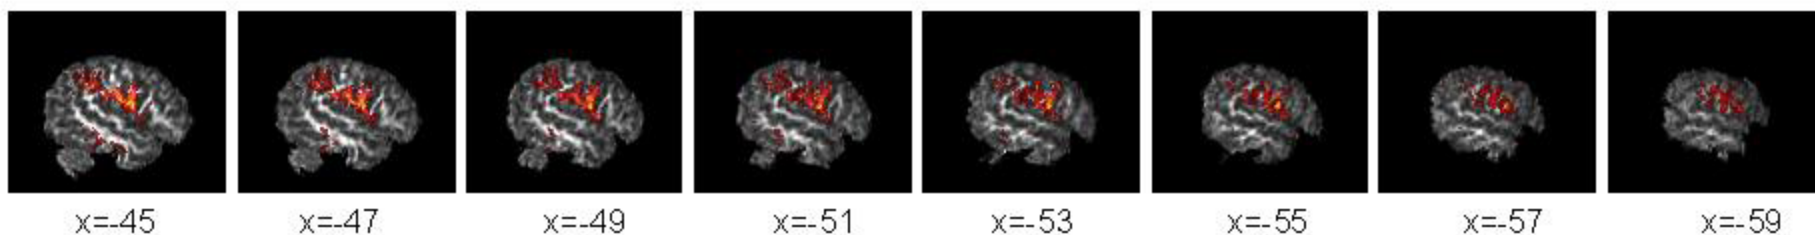

# ANTERIOR SEGMENT - coronal

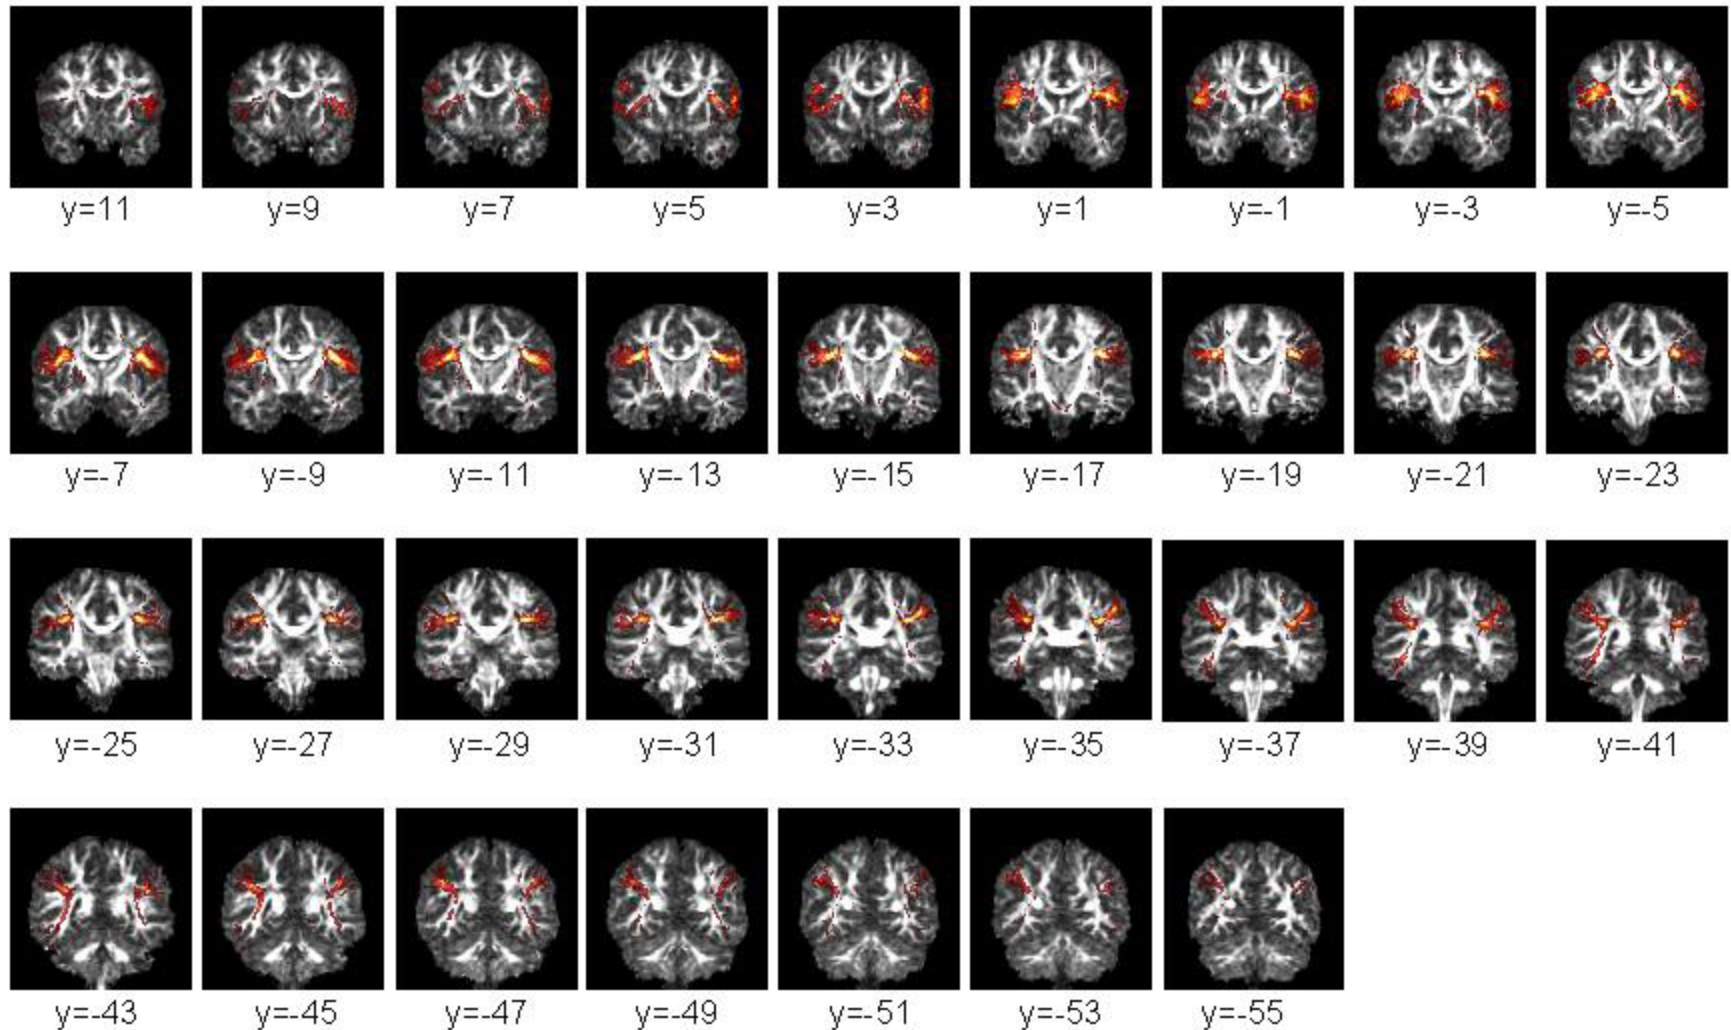

# POSTERIOR SEGMENT - axial

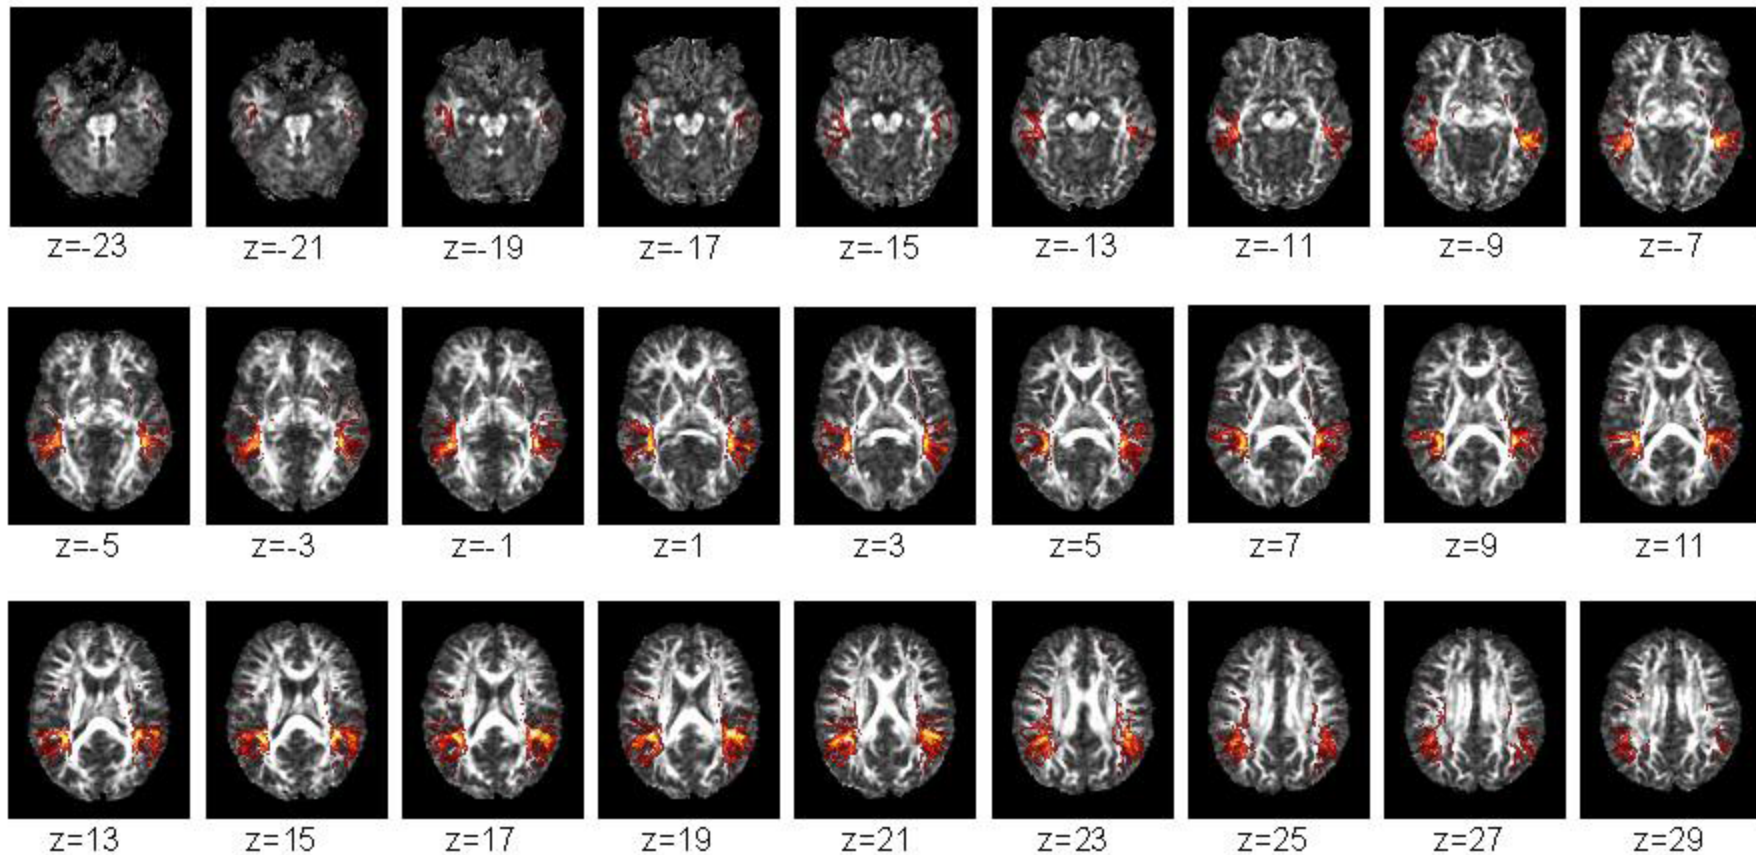



# POSTERIOR SEGMENT - coronal

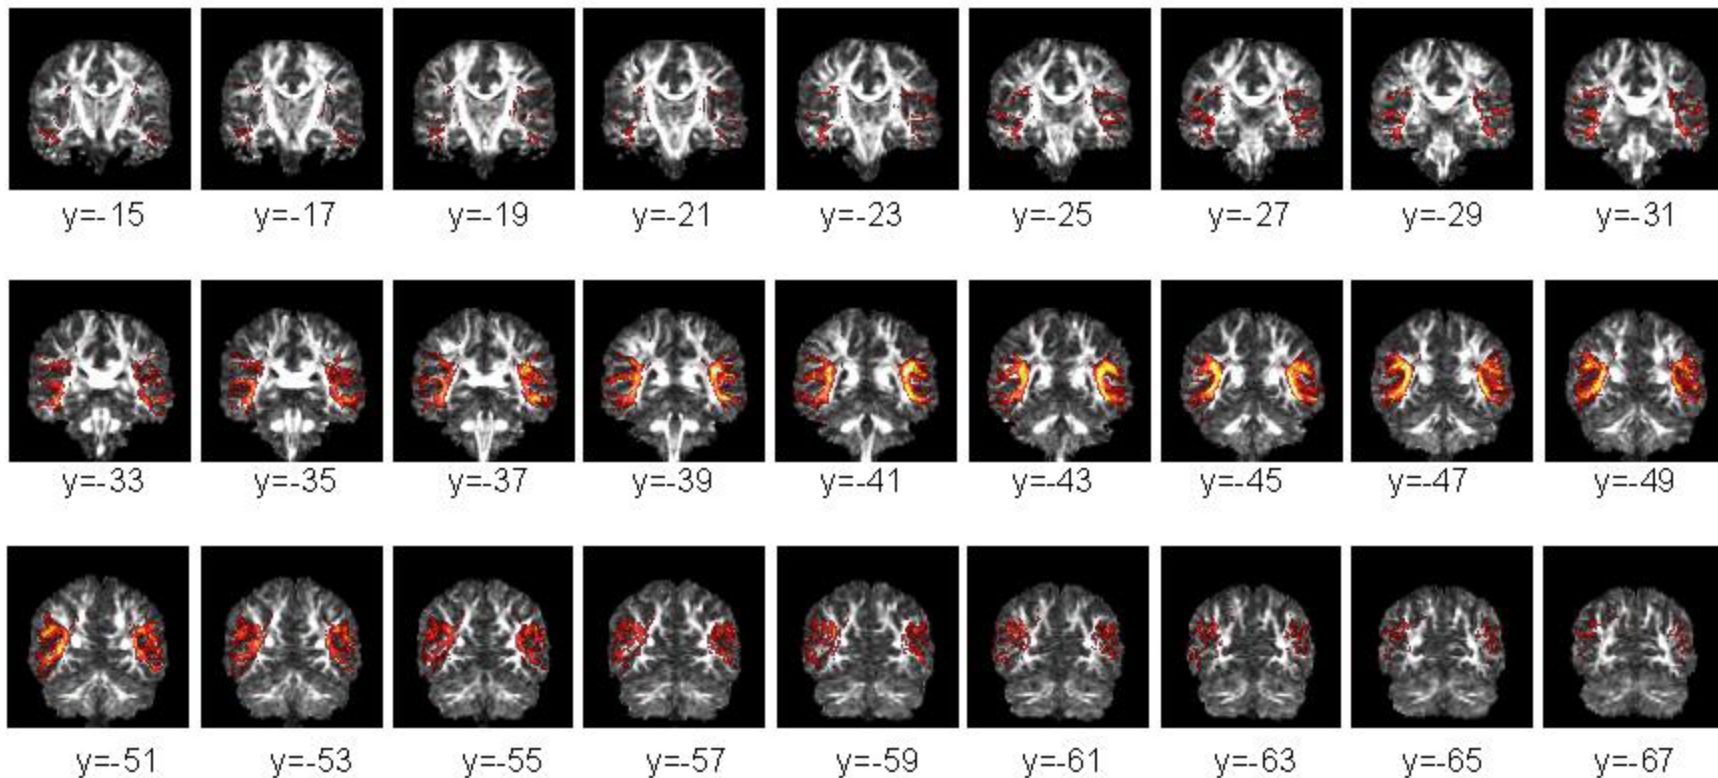

# POSTERIOR SEGMENT – sagittal

Right

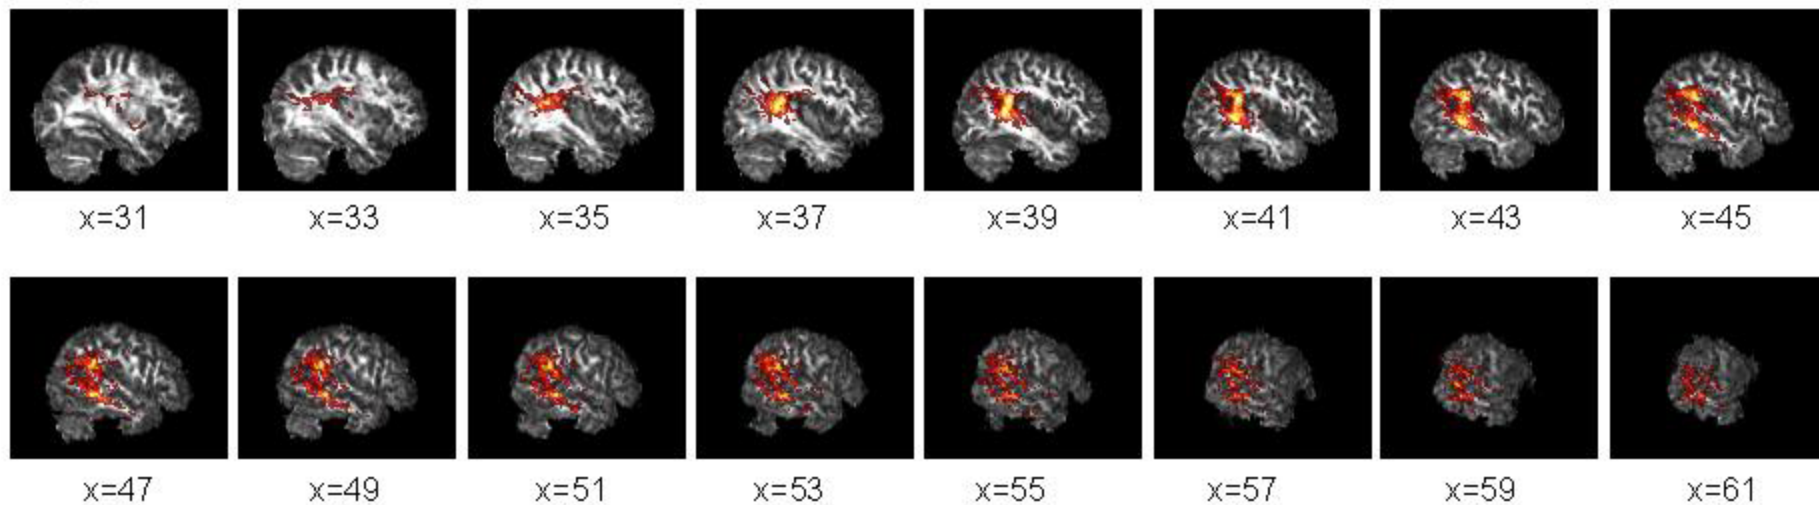

Left

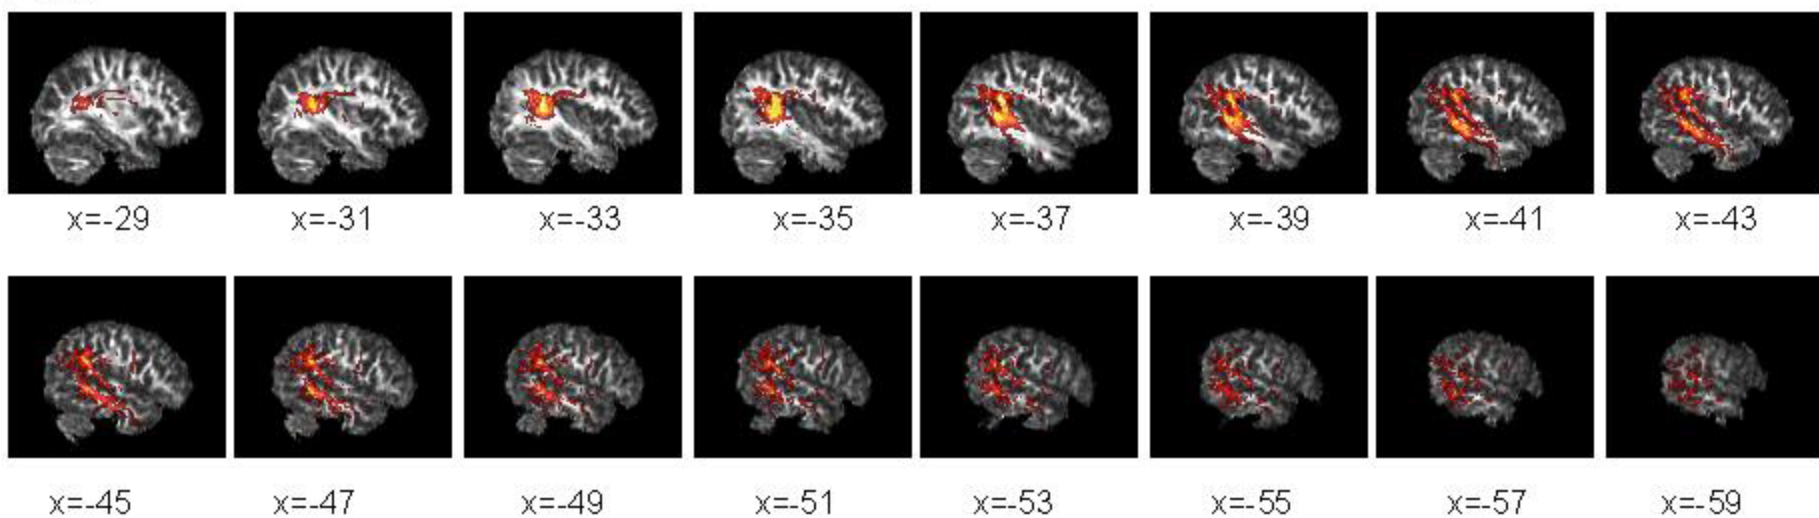

# LONG SEGMENT - axial

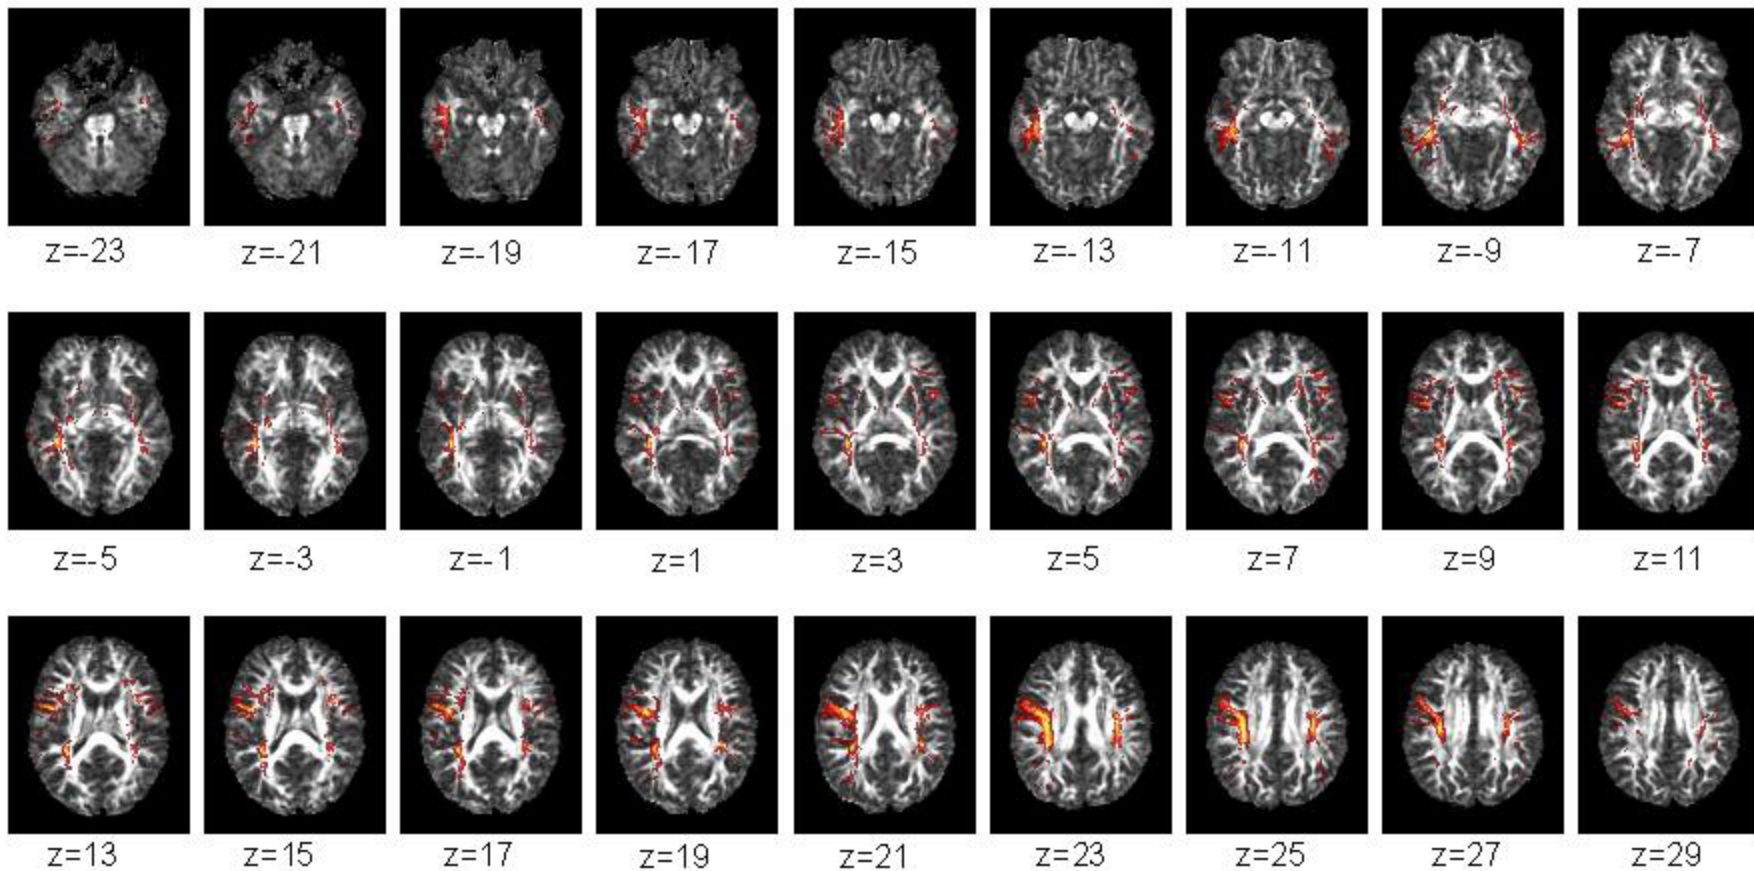

# LONG SEGMENT - coronal

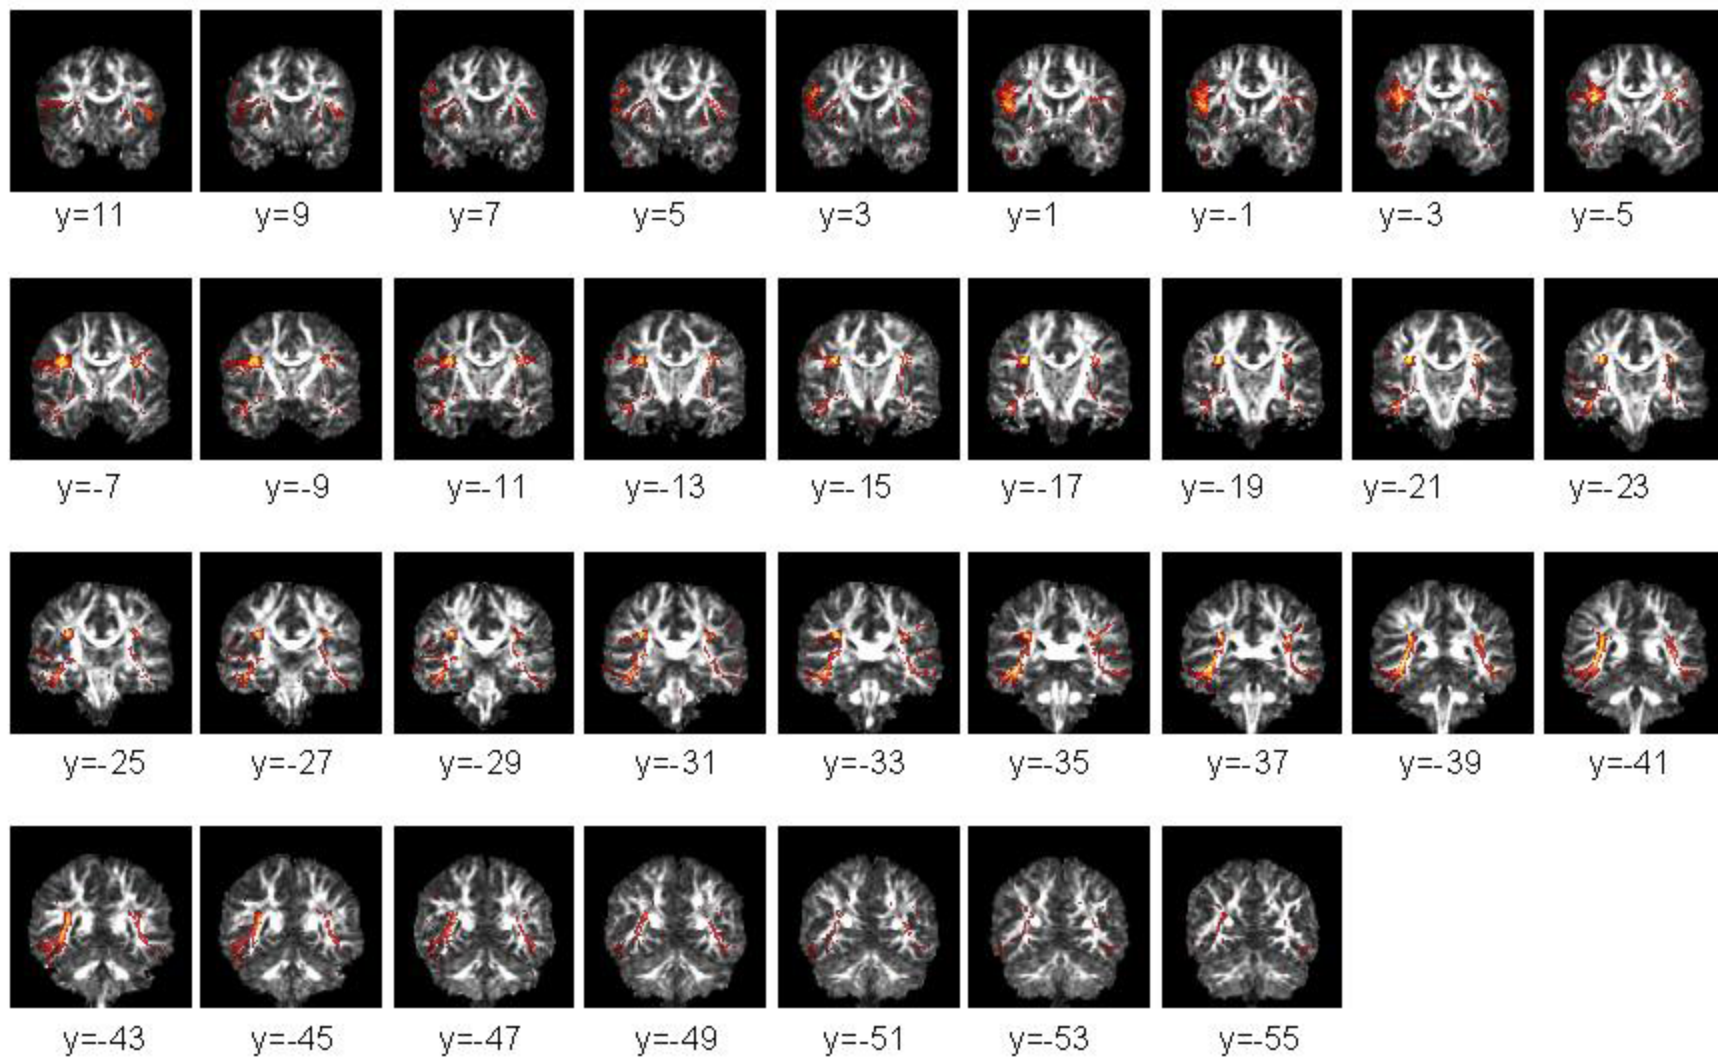



# LONG SEGMENT – sagittal

Right

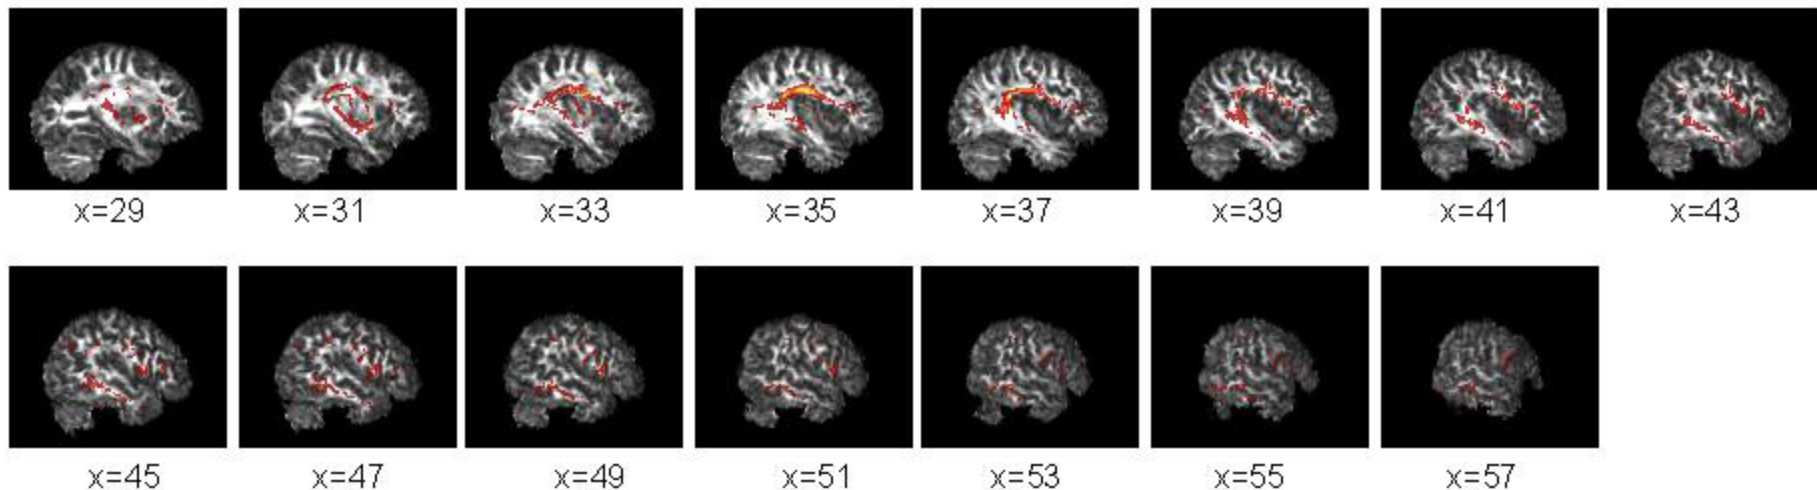

Left

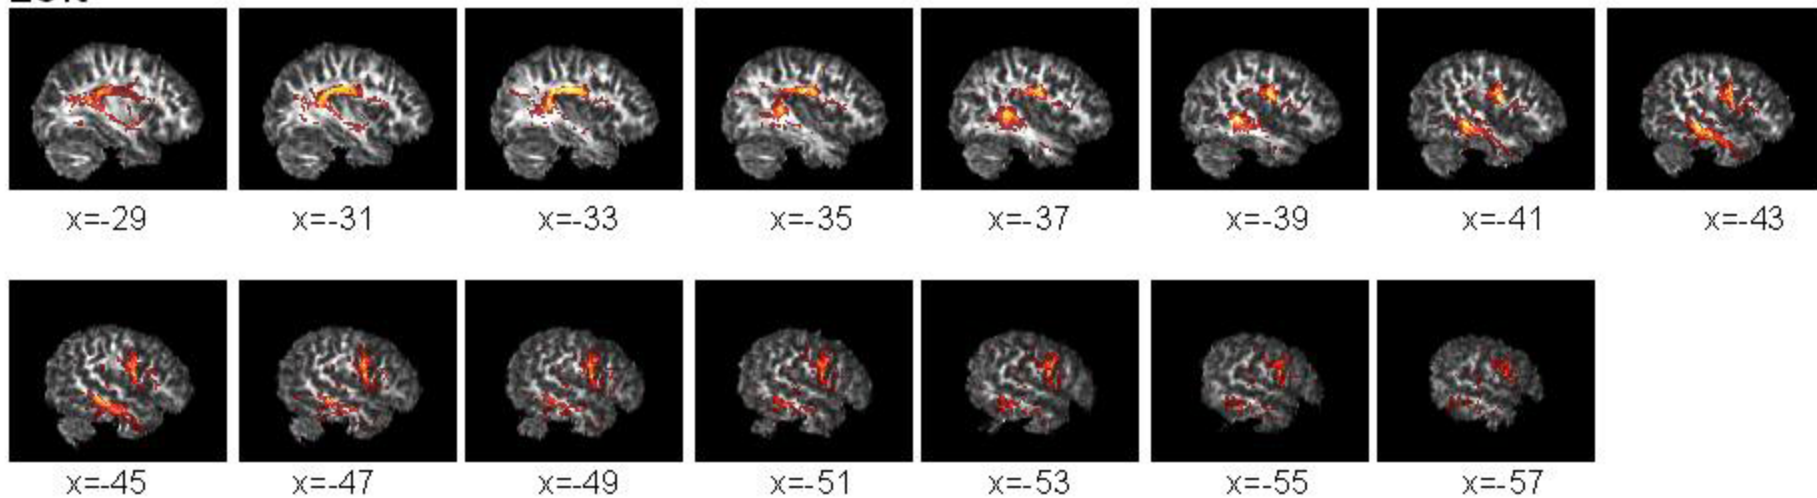

Supplement: pnas_0702116104_1.pdf [file pnas_0702116104_1.pdf]
