# Supplementary material
Source: PubMed Central journal article supplement (PMC2040413)

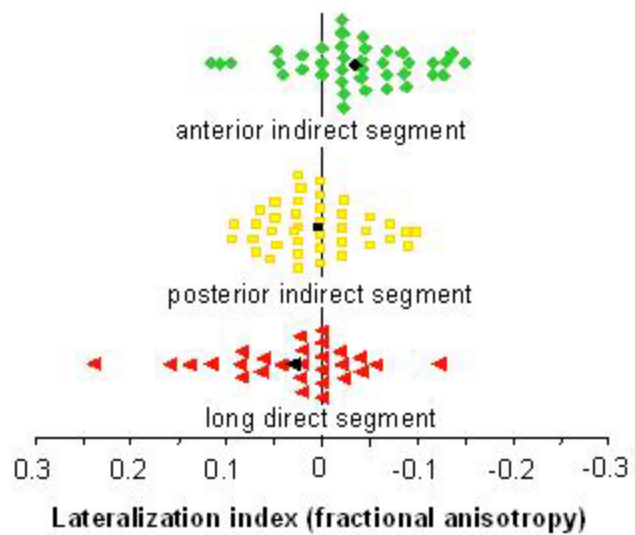

Supplement: pnas_0702116104_2.pdf [file pnas_0702116104_2.pdf]

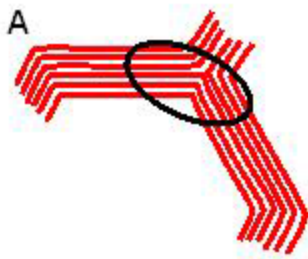

ONE-ROI APPROACH

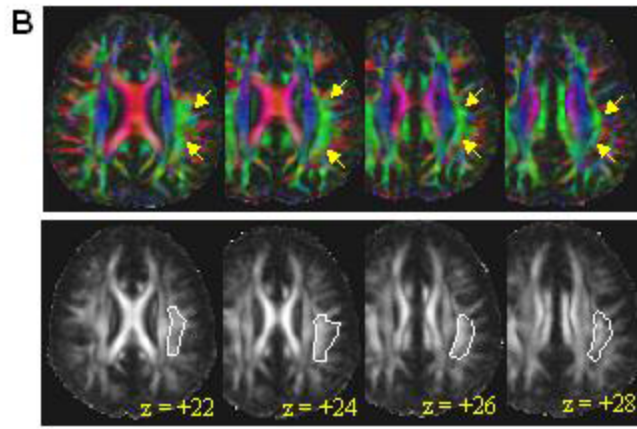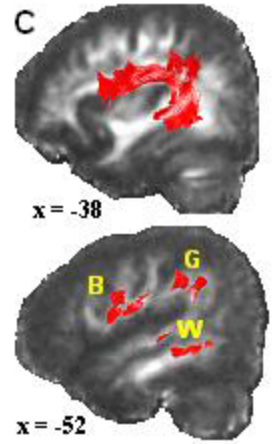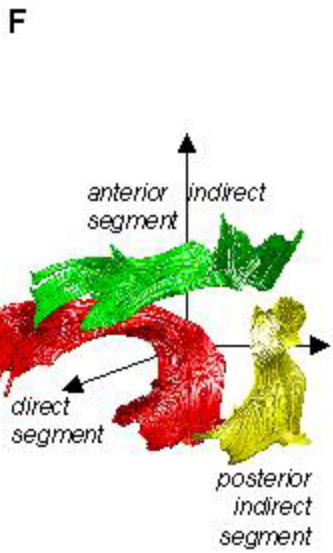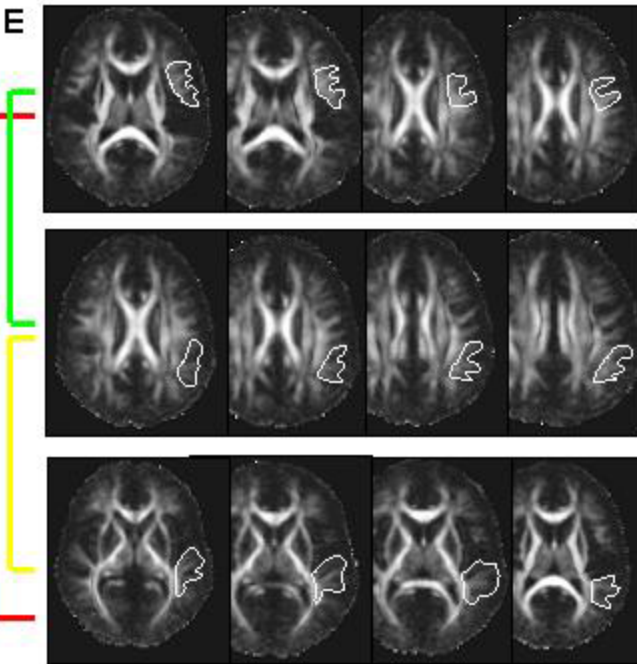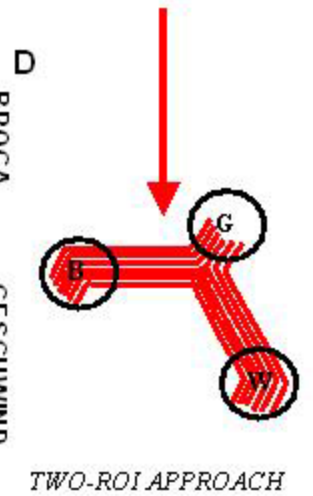

TWO-ROI APPROACH

Supplement: pnas_0702116104_3.pdf [file pnas_0702116104_3.pdf]
